# Supplementary material for: Redefining the Incidence and Profile of Fluoropyrimidine-Associated Cardiotoxicity in Cancer Patients: A Systematic Review and Meta-Analysis
Source: Pharmaceuticals (Basel). 2023 Mar 30;16(4):510. doi: 10.3390/ph16040510 (PMC10146083; doi:10.3390/ph16040510)
Supplement: Supplementary file 1 [file pharmaceuticals-16-00510-s001.zip]

Archive with 11 entries (11 files):
- Figure S1 Number of articles published by year.pdf
- Figure S2 Forest plot of the all grade.pdf
- Figure S3 Forest plot of  grade 3 or higher.pdf
- Figure S4 Forest plot of grade 1 or grade 2.pdf
- Figure S5 Forest plot for the subgroup analysis of 5-FU dosages.pdf
- Figure S6 Subgroup analysis by 5-FU dose.pdf
- Figure S7 Bubble plot of the univariable meta-regression of continuous data .pdf
- Figure S8A-F Eggers funnel plot.pdf
- Figure S9A-F Sensitivity analysis of main outcomes.pdf
- Supplementary Figure legends.pdf
- Supplementary Table S1-S3 .pdf
